# Supplementary material
Source: Research Square preprint supplement (doi:10.21203/rs.3.rs-9473769/v1)
Supplement: Supplementary file 1 [file 6f5c6bd0b6297d327233d70b.pdf]

# **Supplementary material for “Disentangling the anthropogenic climate change influence on recent hydroclimate whiplash events via multiple nudged model simulations”**

Authors: Niklas Merz<sup>1,2\*</sup>, Jakob Zscheischler<sup>1,2</sup>, Istvan Dunkl<sup>3</sup>, Sebastian Sippel<sup>3</sup>, Antonio Sánchez Benítez<sup>4</sup>, Helge Goessling<sup>4</sup>, Amal John<sup>4</sup>, Frauke Feser<sup>5</sup> and Emanuele Bevacqua<sup>1</sup>

<sup>1</sup> *Department of Compound Environmental Risks, Helmholtz Centre for Environmental Research – UFZ, Leipzig, Germany*

<sup>2</sup> *Department of Hydro Sciences, TUD Dresden University of Technology, Dresden, Germany*

<sup>3</sup> *Institute for Meteorology, Leipzig University, Leipzig, Germany*

<sup>4</sup> *Alfred Wegener Institute, Helmholtz-Center for Polar and Marine Research, Bremerhaven, Germany*

<sup>5</sup> *Institute of Coastal Systems, Helmholtz-Zentrum Hereon, Geesthacht, Germany*

\* *Corresponding author E-mail: [niklas.merz@ufz.de](mailto:niklas.merz@ufz.de)*

| CEMS2                | Variable<br>Timeperiod<br>Simulation | Precipitation        |            |            |            |            |            |                     |            |            |            |            |            | Event | Decision |
|----------------------|--------------------------------------|----------------------|------------|------------|------------|------------|------------|---------------------|------------|------------|------------|------------|------------|-------|----------|
|                      |                                      | Historic (1980-2024) |            |            |            |            |            | Present (2017-2024) |            |            |            |            |            |       |          |
|                      |                                      | Nudged simulation    |            | Temporal   |            | Spatial    |            | Nudged simulation   |            | Temporal   |            | Spatial    |            |       |          |
| Region               | Index                                | Anomalies            | Spatial    | Temporal   | Anomalies  | Spatial    | Temporal   | Anomalies           | Spatial    | Temporal   | Anomalies  | Spatial    | Temporal   |       |          |
| Northern Middle East | SPEI-3                               | reasonable           | good       | reasonable | reasonable | good       | reasonable | good                | good       | good       | good       | good       | good       | yes   | yes      |
| Southern China       | SPEI-3                               | reasonable           | reasonable | good       | reasonable | reasonable | reasonable | reasonable          | good       | good       | good       | good       | good       | yes   | yes      |
| East Africa          | SPEI-3                               | reasonable           | reasonable | reasonable | reasonable | reasonable | reasonable | reasonable          | reasonable | reasonable | reasonable | reasonable | reasonable | no    | no       |
| West Africa          | SPEI-3                               | reasonable           | reasonable | good       | bad        | reasonable | good       | reasonable          | good       | good       | good       | good       | good       | no    | no       |
| Northern Europe      | SPEI-12                              | good                 | good       | good       | good       | good       | good       | good                | good       | good       | good       | good       | good       | yes   | yes      |
| North-Central USA    | SPEI-12                              | good                 | good       | good       | reasonable | good       | good       | good                | good       | good       | good       | good       | good       | yes   | yes      |
| Pacific Southwest    | SPEI-12                              | good                 | good       | good       | good       | good       | good       | good                | good       | good       | good       | good       | good       | yes   | yes      |
| Patagonia            | SPEI-12                              | good                 | good       | good       | good       | good       | good       | good                | good       | good       | good       | good       | good       | yes   | yes      |
| Southeast Australia  | SPEI-12                              | good                 | good       | good       | good       | good       | good       | good                | good       | good       | good       | good       | good       | yes   | yes      |
| Central America      | SPEI-12                              | reasonable           | reasonable | good       | reasonable | reasonable | good       | reasonable          | good       | good       | good       | good       | good       | yes   | yes      |

S1: Final results of the CESM2 model evaluation. A detailed description of the decision criteria is provided in the Methods section and Table 1. The final column "Decision" specifies whether the model is used for each region. The row "Time period" distinguishes between the event period (2017-2024) and the calibration period (1980-2024). The row "Simulation" specifies the individual climate model run with further details given in the Methods.

| IFS-FESOM            | Variable<br>Timeperiod<br>Simulation | Precipitation           |            |            |            |            |            |                         |            |            |            |         |          | Event         | Decision |
|----------------------|--------------------------------------|-------------------------|------------|------------|------------|------------|------------|-------------------------|------------|------------|------------|---------|----------|---------------|----------|
|                      |                                      | Historic (1980-2014)    |            |            |            |            |            | Present (2017-2024)     |            |            |            |         |          |               |          |
|                      |                                      | Free running simulation |            | Temporal   |            | Spatial    |            | Free running simulation |            | Temporal   |            | Spatial |          |               |          |
| Region               | Index                                | Anomalies               | Spatial    | Temporal   | PearsonR   | Spatial    | Temporal   | Anomalies               | Spatial    | Temporal   | Anomalies  | Spatial | Temporal |               |          |
| Northern Middle East | SPEI-3                               | bad                     | good       | reasonable | good       | good       | reasonable | bad                     | good       | reasonable | good       | good    | good     | yes           | yes      |
| Southern China       | SPEI-3                               | bad                     | good       | good       | good       | good       | good       | bad                     | good       | good       | good       | good    | good     | yes           | yes      |
| East Africa          | SPEI-3                               | bad                     | reasonable | reasonable | good       | reasonable | reasonable | bad                     | reasonable | good       | good       | good    | good     | yes           | yes      |
| West Africa          | SPEI-3                               | bad                     | reasonable | good       | reasonable | good       | good       | bad                     | good       | good       | reasonable | good    | good     | no            | no       |
| Northern Europe      | SPEI-12                              | bad                     | good       | good       | good       | good       | good       | bad                     | good       | good       | good       | good    | good     | yes           | yes      |
| North-Central USA    | SPEI-12                              | bad                     | good       | good       | good       | good       | good       | bad                     | good       | good       | good       | good    | good     | yes           | yes      |
| Pacific Southwest    | SPEI-12                              | bad                     | good       | good       | good       | good       | good       | bad                     | good       | good       | good       | good    | good     | yes           | yes      |
| Patagonia            | SPEI-12                              | bad                     | good       | reasonable | good       | good       | good       | bad                     | good       | good       | good       | good    | good     | no (not in t) | no       |
| Southeast Australia  | SPEI-12                              | bad                     | good       | good       | good       | good       | good       | bad                     | good       | good       | good       | good    | good     | yes           | yes      |
| Central America      | SPEI-12                              | bad                     | reasonable | good       | good       | reasonable | good       | bad                     | good       | good       | good       | good    | good     | yes           | yes      |

S2: Final results of the IFS-FESM model evaluation. A detailed description is provided for S1.

| Variable |                      | Precipitation          |            |            |                         |            |            |                        |            |            |                         |            |            |            |
|----------|----------------------|------------------------|------------|------------|-------------------------|------------|------------|------------------------|------------|------------|-------------------------|------------|------------|------------|
|          |                      | Historic (1980-2024)   |            |            |                         |            |            | Present (2017-2024)    |            |            |                         |            |            |            |
|          |                      | Long-nudged simulation |            |            | Short-nudged simulation |            |            | Long-nudged simulation |            |            | Short-nudged simulation |            |            |            |
| Region   | Index                | Ensemble               | E1         |            | E2                      |            | E3         |                        | E4         |            | E5                      |            |            |            |
|          |                      |                        | Anomalies  | Spatial    | Temporal                | Anomalies  | Spatial    | Temporal               | Anomalies  | Spatial    | Temporal                | Anomalies  | Spatial    | Temporal   |
| AWI-CM-1 | Northern Middle East | SPEI-3                 | reasonable | reasonable | reasonable              | reasonable | reasonable | reasonable             | reasonable | reasonable | reasonable              | reasonable | reasonable | reasonable |
|          | Southern China       | SPEI-3                 | reasonable | reasonable | good                    | reasonable | reasonable | good                   | reasonable | reasonable | good                    | reasonable | reasonable | good       |
|          | East Africa          | SPEI-3                 | bad        | reasonable | reasonable              | bad        | reasonable | good                   | bad        | reasonable | good                    | bad        | reasonable | good       |
|          | West Africa          | SPEI-3                 | bad        | reasonable | good                    | bad        | reasonable | good                   | bad        | reasonable | good                    | bad        | reasonable | good       |
|          | Northern Europe      | SPEI-12                | reasonable | good       | reasonable              | good       | reasonable | reasonable             | good       | reasonable | reasonable              | good       | reasonable | reasonable |
|          | North-Central USA    | SPEI-12                | reasonable | good       | reasonable              | good       | reasonable | reasonable             | good       | reasonable | reasonable              | good       | reasonable | reasonable |
|          | Pacific Southwest    | SPEI-12                | reasonable | good       | reasonable              | good       | reasonable | reasonable             | good       | reasonable | reasonable              | good       | reasonable | reasonable |
|          | Patagonia            | SPEI-12                | reasonable | reasonable | reasonable              | good       | reasonable | good                   | reasonable | good       | reasonable              | good       | reasonable | good       |
|          | Southeast Australia  | SPEI-12                | reasonable | reasonable | reasonable              | good       | reasonable | reasonable             | good       | reasonable | reasonable              | good       | reasonable | reasonable |
|          | Central America      | SPEI-12                | reasonable | reasonable | good                    | reasonable | reasonable | reasonable             | good       | reasonable | reasonable              | good       | reasonable | reasonable |

S3: Final results of the AWI-CM-1 model evaluation. A detailed description is provided for S1. Part 1/3.

| Variable |                      | PET                    |            |            |                         |            |            |                        |            |            |                         |            |            |          |
|----------|----------------------|------------------------|------------|------------|-------------------------|------------|------------|------------------------|------------|------------|-------------------------|------------|------------|----------|
|          |                      | Historic (1980-2024)   |            |            |                         |            |            | Present (2017-2024)    |            |            |                         |            |            |          |
|          |                      | Long-nudged simulation |            |            | Short-nudged simulation |            |            | Long-nudged simulation |            |            | Short-nudged simulation |            |            |          |
| Region   | Index                | Ensemble               | E1         |            | E2                      |            | E3         |                        | E4         |            | E5                      |            |            |          |
|          |                      |                        | Anomalies  | Spatial    | Temporal                | Anomalies  | Spatial    | Temporal               | Anomalies  | Spatial    | Temporal                | Anomalies  | Spatial    | Temporal |
| AWI-CM-1 | Northern Middle East | SPEI-3                 | good       | good       | good                    | good       | good       | good                   | good       | good       | good                    | good       | good       | good     |
|          | Southern China       | SPEI-3                 | reasonable | good       | good                    | reasonable | good       | good                   | reasonable | good       | good                    | reasonable | good       | good     |
|          | East Africa          | SPEI-3                 | reasonable | reasonable | good                    | reasonable | good       | good                   | reasonable | good       | good                    | reasonable | good       | good     |
|          | West Africa          | SPEI-3                 | reasonable | reasonable | good                    | reasonable | good       | good                   | reasonable | good       | good                    | reasonable | good       | good     |
|          | Northern Europe      | SPEI-12                | good       | good       | good                    | good       | good       | good                   | good       | good       | good                    | good       | good       | good     |
|          | North-Central USA    | SPEI-12                | good       | good       | good                    | good       | good       | good                   | good       | good       | good                    | good       | good       | good     |
|          | Pacific Southwest    | SPEI-12                | good       | good       | good                    | good       | good       | good                   | good       | good       | good                    | good       | good       | good     |
|          | Patagonia            | SPEI-12                | good       | reasonable | good                    | good       | good       | good                   | good       | good       | good                    | good       | good       | good     |
|          | Southeast Australia  | SPEI-12                | good       | good       | good                    | good       | good       | good                   | good       | good       | good                    | good       | good       | good     |
|          | Central America      | SPEI-12                | reasonable | reasonable | good                    | reasonable | reasonable | good                   | reasonable | reasonable | good                    | reasonable | reasonable | good     |

S4: Final results of the AWI-CM-1 model evaluation. A detailed description is provided for S1. Part 2/3.

| Variable |                      | Whiplash Intensity |       |       |       |       |       |                         |       |       |       |          |       |
|----------|----------------------|--------------------|-------|-------|-------|-------|-------|-------------------------|-------|-------|-------|----------|-------|
|          |                      | Event Time         |       |       |       |       |       | Short-nudged simulation |       |       |       |          |       |
|          |                      | E1                 |       | E2    |       | E3    |       | E4                      |       | E5    |       | Decision |       |
| Region   | Index                | Event              | Event | Event | Event | Event | Event | Event                   | Event | Event | Event | Event    | Event |
| AWI-CM-1 | Northern Middle East | SPEI-3             | yes   | yes   | yes   | yes   | yes   | yes                     | yes   | yes   | yes   | yes      | yes   |
|          | Southern China       | SPEI-3             | yes   | yes   | yes   | yes   | yes   | yes                     | yes   | yes   | yes   | yes      | yes   |
|          | East Africa          | SPEI-3             | no    | no    | no    | no    | no    | no                      | no    | no    | no    | no       | no    |
|          | West Africa          | SPEI-3             | no    | no    | no    | no    | no    | no                      | no    | no    | no    | no       | no    |
|          | Northern Europe      | SPEI-12            | yes   | yes   | yes   | yes   | yes   | yes                     | yes   | yes   | yes   | yes      | yes   |
|          | North-Central USA    | SPEI-12            | yes   | yes   | yes   | yes   | yes   | yes                     | yes   | yes   | yes   | yes      | yes   |
|          | Pacific Southwest    | SPEI-12            | yes   | yes   | yes   | yes   | yes   | yes                     | yes   | yes   | yes   | yes      | yes   |
|          | Patagonia            | SPEI-12            | yes   | yes   | yes   | yes   | yes   | yes                     | yes   | yes   | yes   | yes      | yes   |
|          | Southeast Australia  | SPEI-12            | yes   | yes   | yes   | yes   | yes   | yes                     | yes   | yes   | yes   | yes      | yes   |
|          | Central America      | SPEI-12            | no    | no    | no    | no    | no    | no                      | no    | no    | no    | no       | no    |

S5: Final results of the AWI-CM-1 model evaluation. A detailed description is provided for S1. Part 3/3.

| Variable   |                      | Precipitation          |            |            |            |            |            |            |            |            |                     |            |            |            |            |            |            |            |            |            |            |
|------------|----------------------|------------------------|------------|------------|------------|------------|------------|------------|------------|------------|---------------------|------------|------------|------------|------------|------------|------------|------------|------------|------------|------------|
|            |                      | Historic (1980-2024)   |            |            |            |            |            |            |            |            | Present (2017-2024) |            |            |            |            |            |            |            |            |            |            |
|            |                      | Long-nudged simulation |            |            | E1         |            |            | E2         |            |            | E3                  |            |            | E4         |            |            | E5         |            |            |            |            |
| Timeperiod | Simulation           | Ensemble               | Anomalies  | Spatial    | Temporal   | Anomalies  | Spatial    | Temporal   | Anomalies  | Spatial    | Temporal            | Anomalies  | Spatial    | Temporal   | Anomalies  | Spatial    | Temporal   | Anomalies  | Spatial    | Temporal   |            |
| ECHAM6     | Northern Middle East | SPEI-3                 | reasonable          | reasonable | reasonable | reasonable | reasonable | reasonable | reasonable | reasonable | reasonable | reasonable | reasonable |
|            | Southern China       | SPEI-3                 | reasonable | reasonable | good       | reasonable | reasonable | good       | reasonable | reasonable | good                | reasonable | reasonable | good       | reasonable | reasonable | good       | reasonable | reasonable | good       | reasonable |
|            | East Africa          | SPEI-3                 | reasonable | reasonable | reasonable | reasonable | reasonable | reasonable | good       | reasonable | good                | reasonable | reasonable | good       | reasonable | reasonable | good       | reasonable | reasonable | good       | reasonable |
|            | West Africa          | SPEI-3                 | bad        | reasonable | good       | bad        | reasonable | good       | good       | reasonable | good                | good       | reasonable | good       | good       | bad        | reasonable | good       | good       | reasonable | good       |
|            | Northern Europe      | SPEI-12                | good       | reasonable | reasonable | good       | reasonable | good       | reasonable | good       | reasonable          | good       | reasonable | good       | reasonable | good       | reasonable | good       | reasonable | good       | reasonable |
|            | North-Central USA    | SPEI-12                | reasonable | good       | reasonable | reasonable | good       | reasonable | good       | reasonable | good                | reasonable | good       | reasonable | good       | reasonable | good       | reasonable | good       | reasonable | good       |
|            | Pacific Southwest    | SPEI-12                | good                | good       | good       | good       | good       | good       | good       | good       | good       | good       | good       |
|            | Patagonia            | SPEI-12                | reasonable | good       | reasonable | reasonable | reasonable | good       | reasonable | good       | reasonable          | good       | reasonable | good       | reasonable | good       | reasonable | good       | reasonable | good       | reasonable |
|            | Southeast Australia  | SPEI-12                | good       | reasonable | reasonable | good       | reasonable | reasonable | reasonable | good       | reasonable          | reasonable | good       | reasonable | reasonable | good       | reasonable | reasonable | good       | reasonable | reasonable |
|            | Central America      | SPEI-12                | reasonable          | reasonable | reasonable | reasonable | reasonable | reasonable | reasonable | reasonable | reasonable | reasonable | reasonable |

S6: Final results of the ECHAM6 model evaluation. A detailed description is provided for S1, Part 1/3.

| Variable   |                      | PET                    |            |            |          |            |         |            |            |            |                     |            |         |            |            |            |          |            |         |            |      |
|------------|----------------------|------------------------|------------|------------|----------|------------|---------|------------|------------|------------|---------------------|------------|---------|------------|------------|------------|----------|------------|---------|------------|------|
|            |                      | Historic (1980-2024)   |            |            |          |            |         |            |            |            | Present (2017-2024) |            |         |            |            |            |          |            |         |            |      |
|            |                      | Long-nudged simulation |            |            | E1       |            |         | E2         |            |            | E3                  |            |         | E4         |            |            | E5       |            |         |            |      |
| Timeperiod | Simulation           | Ensemble               | Anomalies  | Spatial    | Temporal | Anomalies  | Spatial | Temporal   | Anomalies  | Spatial    | Temporal            | Anomalies  | Spatial | Temporal   | Anomalies  | Spatial    | Temporal | Anomalies  | Spatial | Temporal   |      |
| ECHAM6     | Northern Middle East | SPEI-3                 | good       | good       | good     | good       | good    | good       | good       | good       | good                | good       | good    | good       | good       | good       | good     | good       | good    | good       | good |
|            | Southern China       | SPEI-3                 | reasonable | good       | good     | reasonable | good    | good       | reasonable | good       | good                | reasonable | good    | good       | reasonable | good       | good     | reasonable | good    | good       | good |
|            | East Africa          | SPEI-3                 | reasonable | reasonable | good     | reasonable | good    | good       | reasonable | good       | good                | reasonable | good    | good       | reasonable | good       | good     | reasonable | good    | good       | good |
|            | West Africa          | SPEI-3                 | reasonable | good       | good     | reasonable | good    | good       | good       | reasonable | good                | good       | good    | good       | good       | good       | good     | good       | good    | good       | good |
|            | Northern Europe      | SPEI-12                | good       | good       | good     | good       | good    | good       | good       | good       | good                | good       | good    | good       | good       | good       | good     | good       | good    | good       | good |
|            | North-Central USA    | SPEI-12                | good       | good       | good     | good       | good    | good       | good       | good       | good                | good       | good    | good       | good       | good       | good     | good       | good    | good       | good |
|            | Pacific Southwest    | SPEI-12                | good       | good       | good     | good       | good    | good       | good       | good       | good                | good       | good    | good       | good       | good       | good     | good       | good    | good       | good |
|            | Patagonia            | SPEI-12                | good       | good       | good     | good       | good    | good       | good       | good       | good                | good       | good    | good       | good       | good       | good     | good       | good    | good       | good |
|            | Southeast Australia  | SPEI-12                | good       | good       | good     | good       | good    | good       | good       | good       | good                | good       | good    | good       | good       | good       | good     | good       | good    | good       | good |
|            | Central America      | SPEI-12                | reasonable | good       | good     | reasonable | good    | reasonable | good       | reasonable | good                | reasonable | good    | reasonable | good       | reasonable | good     | reasonable | good    | reasonable | good |

S7: Final results of the ECHAM6 model evaluation. A detailed description is provided for S1, Part 2/3.

| Variable |                      | Whiplash Intensity |     |     |     |     |                         |     |     |     |     | Decision |     |     |     |     |     |     |     |     |     |
|----------|----------------------|--------------------|-----|-----|-----|-----|-------------------------|-----|-----|-----|-----|----------|-----|-----|-----|-----|-----|-----|-----|-----|-----|
|          |                      | Event Time         |     |     |     |     | Short-nudged simulation |     |     |     |     |          |     |     |     |     |     |     |     |     |     |
|          |                      | E1                 | E2  | E3  | E4  | E5  | E1                      | E2  | E3  | E4  | E5  |          |     |     |     |     |     |     |     |     |     |
| ECHAM6   | Northern Middle East | SPEI-3             | yes | yes | yes | yes | yes                     | yes | yes | yes | yes | yes      | yes | yes | yes | yes | yes | yes | yes | yes | yes |
|          | Southern China       | SPEI-3             | yes | yes | yes | yes | yes                     | yes | yes | yes | yes | yes      | yes | yes | yes | yes | yes | yes | yes | yes | yes |
|          | East Africa          | SPEI-3             | no  | no  | no  | no  | no                      | no  | no  | no  | no  | no       | no  | no  | no  | no  | no  | no  | no  | no  | no  |
|          | West Africa          | SPEI-3             | no  | no  | no  | no  | no                      | no  | no  | no  | no  | no       | no  | no  | no  | no  | no  | no  | no  | no  | no  |
|          | Northern Europe      | SPEI-12            | yes | yes | yes | yes | yes                     | yes | yes | yes | yes | yes      | yes | yes | yes | yes | yes | yes | yes | yes | yes |
|          | North-Central USA    | SPEI-12            | yes | yes | yes | yes | yes                     | yes | yes | yes | yes | yes      | yes | yes | yes | yes | yes | yes | yes | yes | yes |
|          | Pacific Southwest    | SPEI-12            | yes | yes | yes | yes | yes                     | yes | yes | yes | yes | yes      | yes | yes | yes | yes | yes | yes | yes | yes | yes |
|          | Patagonia            | SPEI-12            | yes | yes | yes | yes | yes                     | yes | yes | yes | yes | yes      | yes | yes | yes | yes | yes | yes | yes | yes | yes |
|          | Southeast Australia  | SPEI-12            | yes | yes | yes | yes | yes                     | yes | yes | yes | yes | yes      | yes | yes | yes | yes | yes | yes | yes | yes | yes |
|          | Central America      | SPEI-12            | no  | no  | no  | no  | no                      | no  | no  | no  | no  | no       | no  | no  | no  | no  | no  | no  | no  | no  | no  |

S8: Final results of the ECHAM6 model evaluation. A detailed description is provided for S1, Part 3/3.

## Supplementary Discussion

The Hargreaves and Samani (1985) formulation is commonly written as:

$$PET = K * R_a * (T + 17.8) * \sqrt{\Delta T} \quad (1)$$

where  $K$  is a coefficient,  $R_a$  the extraterrestrial radiation,  $T$  the mean daily temperature (in °Celsius) and  $\Delta T$  the daily diurnal temperature range. Given that only  $T_{min}$  and  $T_{max}$  is provided,  $T$  and  $\Delta T$  is defined via:

$$T = \frac{T_{max} + T_{min}}{2} \quad (2)$$

$$\Delta T = T_{max} - T_{min} \quad (3)$$

To identify the dominant contributions to the change  $\delta$  between the factual (his) and counterfactual (pi) simulations, we approximate  $\delta PET$  using a first-order Taylor expansion based on the partial derivatives of PET (Eq 1) with respect to  $T$  and  $\Delta T$ :

$$\delta PET \approx K * R_a * \left[ \sqrt{\Delta T_{pi}} * \delta T + \frac{T_{pi} + 17.3}{2 * \sqrt{\Delta T_{pi}}} * \delta(\Delta T) \right] \quad (4)$$

Figure S9a compares the contributions of the two terms, and clearly shows that the first term clearly dominates changes in PET and global warming predominantly affects mean temperature. This supports the conclusion presented in the main text that the larger baseline  $\Delta T$  during dry phases (Figure S9 b,c) leads to stronger PET increases compared to the wet phase.

However, absolute differences in PET do not directly translate into comparable changes in SPEI, as the underlying log-logistic distribution is calibrated individually for each grid cell and month. At the annual timescale (SPEI-12), this effect has only a minor influence, as variability in the distribution is reduced. For SPEI-3, however, the recalibration could potentially lead to different responses, although this does not appear to be the case for the events shown in figure 3 in the main text.

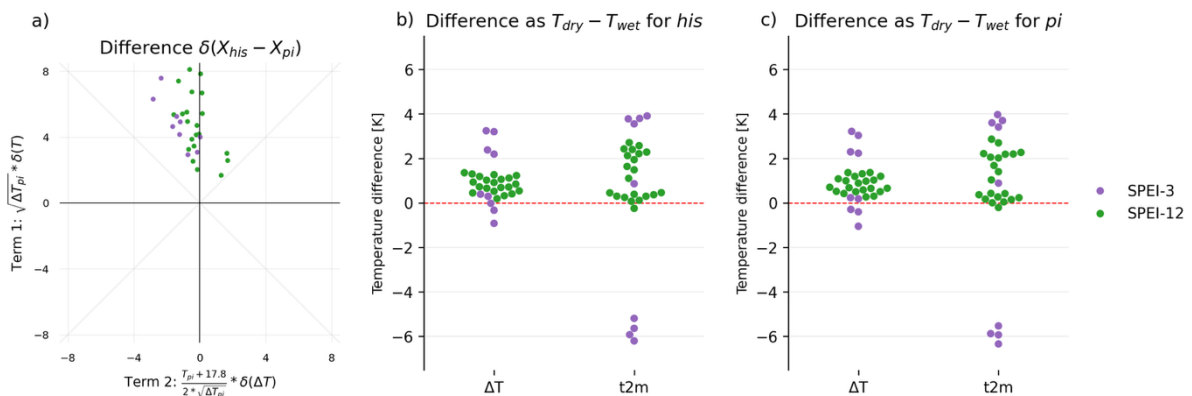

**S9: Details about the driving factors of changes in PET under the hargreaves formulation.** Dots represent all model-event combinations that pass the evaluation and are retained for the analysis. Purple dots correspond to the three SPEI-3 events; green dots correspond to the six SPEI-12 ones.  $T_{min}$  and  $T_{max}$  are computed as aggregated rolling means matching the respective SPEI accumulation period. All values are spatially averaged over the event

region. **a** shows the two terms of equation (4) on the x- and y-axis, comparing the historical and pre-industrial simulation. The input values are temporally averaged over the event period. **b** shows the difference in  $T$  and  $\Delta T$  between the dry and wet phases for the historical simulation. The phases are derived by the start and end dates of the event period. **c** shows the same than b), but for the pre-industrial simulation.
